# Supplementary material for: Probabilistic approach for assessing cancer risk due to benzo[a]pyrene in barbecued meat: Informing advice for population groups
Source: PLOS journal article supplement (doi:10.1371/journal.pone.0207032), 2018-11-08
Supplement: S1 (10.1371/journal.pone.0207032.s001) [file journal.pone.0207032.s001]

## S1 Fig

### Age and sex demographics of the Danish population

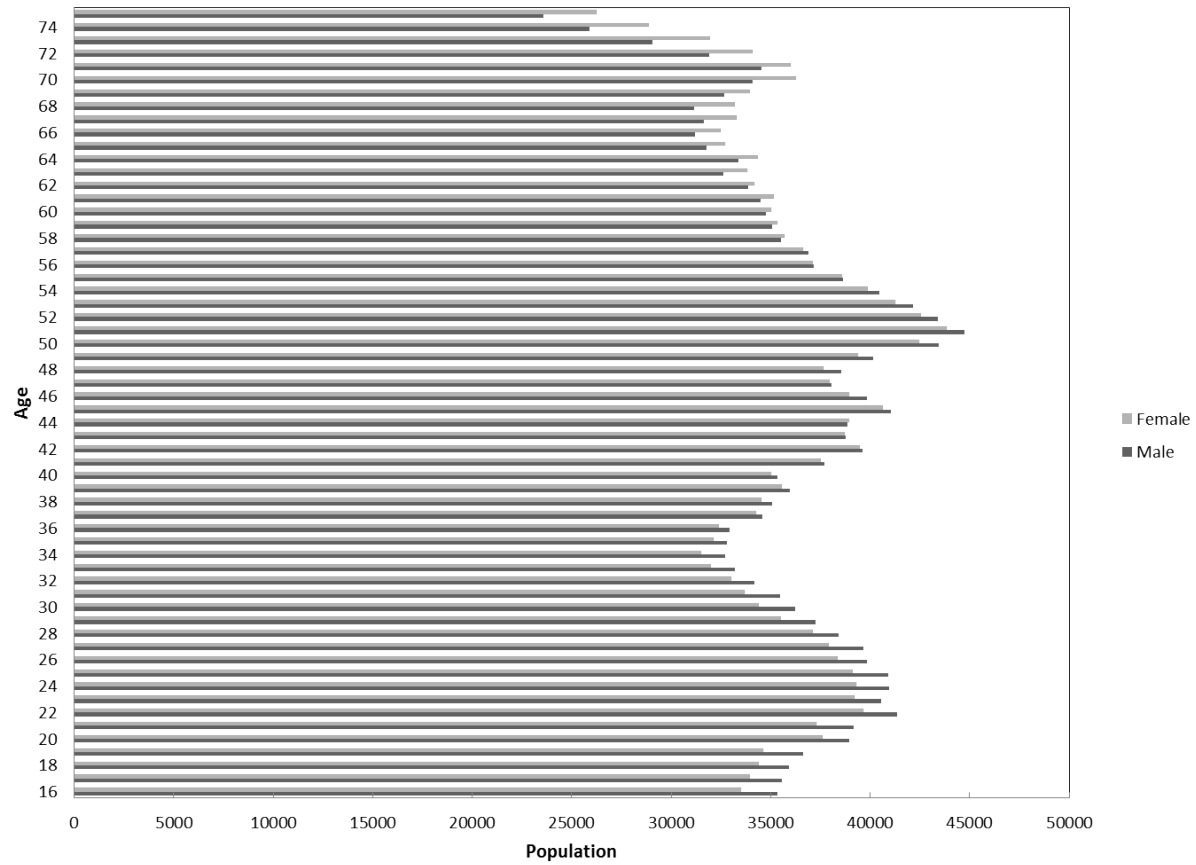

Figure 1: Population size of males and females between age 16-75 in the Danish population per 1<sup>st</sup> day in the 4<sup>th</sup> quater of 2017 (Statistics Denmark, 2018, [www.statistikbanken.dk/FOLK1A](http://www.statistikbanken.dk/FOLK1A))
